# Supplementary material for: Compliance with Cardiovascular Prevention Guidelines in Type 2 Diabetes Individuals in a Middle-Income Region: A Cross-Sectional Analysis
Source: MDPI journal article supplement (doi:10.3390/diagnostics12040814), 2022-03-26
Supplement: s1 [file s1]

# Compliance with Cardiovascular Prevention Guidelines in Type 2 Diabetes Individuals in a Middle-Income Region: A Cross-Sectional Analysis

Joaquim Barreto <sup>1</sup>, Beatriz Luchiari <sup>1</sup>, Vaneza L. W. Wolf <sup>1</sup>, Isabella Bonilha <sup>1</sup>, Ticiane G. Bovi <sup>1</sup>, Barbara S. Assato <sup>1</sup>, Ikaro Breder <sup>1</sup>, Sheila T. Kimura-Medorima <sup>1</sup>, Daniel B. Munhoz <sup>1</sup>, Thiago Quinaglia <sup>1</sup>, Otavio R. Coelho-Filho <sup>2</sup>, Luiz Sergio F. Carvalho <sup>3</sup>, Wilson Nadruz <sup>2</sup> and Andrei C. Sposito <sup>1,2,\*</sup>

<sup>1</sup> Atherosclerosis and Vascular Biology Laboratory (Aterolab), Division of Cardiology, State University of Campinas (Unicamp), Sao Paulo 13083-894, Brazil; joaquimbarretoantunes@gmail.com (J.B.); beatriz.m.luchiari@gmail.com (B.L.); vanessawolf@hotmail.com (V.L.W.W.); isaoliveira.ib@gmail.com (I.B.); ticianebovi@hotmail.com (T.G.B.); barbarasanae@gmail.com (B.S.A.); ikarobreder@gmail.com (I.B.); sheilat@gmail.com (S.T.K.-M.); dbmunhoz@gmail.com (D.B.M.); tquinaglia@yahoo.com.br (T.Q.)

<sup>2</sup> Division of Cardiology, Department of Internal Medicine, Unicamp, Sao Paulo 13083-970, Brazil; tavicocoelho@gmail.com (O.R.C.-F.); wilnj@unicamp.br (W.N.)

<sup>3</sup> Clarity Healthcare Intelligence, Jundiaí 13214-658, Brazil; luizsergiofc@gmail.com

\* Correspondence: sposito@unicamp.br; Tel.: +55-19-3521-7959

Table S1. Supplementary baseline characteristics

|                              | Overall | MR   | HR   | VHR  | <i>p-value</i> |
|------------------------------|---------|------|------|------|----------------|
| <b>n</b>                     | 1030    | 314  | 155  | 561  |                |
| <b>Demographics</b>          |         |      |      |      |                |
| Level of instruction. %      |         |      |      |      | <i>0.004</i>   |
| No formal education          | 29.4    | 27.7 | 19.4 | 33.1 |                |
| Primary school               | 36.1    | 32.2 | 45.2 | 35.8 |                |
| Secondary education          | 28.8    | 32.5 | 29   | 26.7 |                |
| University degree            | 5.7     | 7.6  | 6.5  | 4.5  |                |
| Ethnicity. %                 |         |      |      |      | <i>0.510</i>   |
| Caucasian                    | 68.7    | 67.2 | 72.3 | 68.6 |                |
| Black                        | 11.2    | 11.1 | 8.4  | 11.9 |                |
| Asian                        | 1.8     | 1.6  | 3.9  | 1.4  |                |
| Other                        | 17.1    | 18.8 | 14.2 | 16.9 |                |
| <b>Medical history</b>       |         |      |      |      |                |
| T2D duration > 10 years, %   | 45      | 2.9  | 100  | 50.6 | <i>0.001</i>   |
| CVD, %                       | 17.4    | 0    | 0    | 31.9 | <i>0.001</i>   |
| Coronary heart disease. %    | 15      | 0    | 0    | 27.6 | <i>0.001</i>   |
| Previous ACS. %              | 9.1     | 0    | 0    | 16.8 | <i>0.001</i>   |
| CCS %                        | 4.3     | 0    | 0    | 7.8  | <i>0.001</i>   |
| Previous PCI or CAGB. %      | 7.4     | 0    | 0    | 13.5 | <i>0.001</i>   |
| Stroke                       | 2       | 0    | 0    | 3.7  | <i>0.001</i>   |
| Peripheral artery disease. % | 1.1     | 0    | 0    | 2    | <i>0.001</i>   |
| Retinopathy. %               | 21      | 0    | 0    | 34.6 | <i>0.001</i>   |
| SBP Group                    |         |      |      |      | <i>0.001</i>   |
| > 140mmHg                    | 48.5    | 25,3 | 42,9 | 57   |                |
| 130-140mmHg                  | 23.4    | 37   | 27,8 | 20,3 |                |
| < 130mmHg                    | 28.1    | 37,7 | 29,3 | 22,7 |                |

|                          |                            |      |      |      |      |                      |
|--------------------------|----------------------------|------|------|------|------|----------------------|
| LDL-C categories         |                            |      |      |      |      | 0.248                |
|                          | ≥ 100 mg/dL                | 54.4 | 57.2 | 57.7 | 53.1 |                      |
|                          | 70-100mg/dL                | 30   | 28.9 | 27.9 | 30.1 |                      |
|                          | 55-70mg/dL                 | 9.8  | 9.8  | 12.3 | 9.0  |                      |
|                          | <55mg/dL                   | 5.9  | 4.1  | 2.1  | 7.8  |                      |
| HbA1c range. %           |                            |      |      |      |      | 0.001                |
|                          | ≥8%                        | 41.2 | 31.4 | 48.6 | 44.5 |                      |
|                          | 7 to 8%                    | 21.7 | 18.4 | 23.4 | 23   |                      |
|                          | <7%                        | 37.1 | 50.2 | 28   | 32.5 |                      |
| <b>Medications</b>       |                            |      |      |      |      |                      |
| Antihypertensive, %      |                            | 64.4 | 42   | 52.3 | 80.2 | 0.001                |
|                          | ARB. %                     | 45   | 30.3 | 37.4 | 55.3 | 0.001                |
|                          | Beta-blocker. %            | 24.8 | 11.5 | 12.3 | 35.7 | 0.001                |
|                          | Thiazide diuretics. %      | 24.2 | 15.6 | 18.7 | 30.5 | 0.001                |
|                          | Calcium channel blocker. % | 15.1 | 9.6  | 14.8 | 18.4 | 0.001                |
|                          | ACEi. %                    | 12.6 | 7.3  | 7.1  | 17.1 | 0.001                |
|                          | Espironolactone. %         | 6.6  | 1.6  | 3.2  | 10.3 | 0.001                |
|                          | Loop diuretics. %          | 5.5  | 1.9  | 1.9  | 8.6  | 0.001                |
|                          | Hydralazine. %             | 0.6  | 0.3  | 0    | 0.9  | 0.331                |
|                          | ACE or ARB, %              | 55.4 | 36   | 43.9 | 69.5 | 0.001 <sup>b,c</sup> |
| Number of AHT classes, % |                            |      |      |      |      | 0.001 <sup>b</sup>   |
|                          | 0                          | 35,6 | 58   | 47,7 | 19,8 |                      |
|                          | 1                          | 25   | 19,1 | 25,2 | 28,2 |                      |
|                          | 2                          | 18,9 | 13.4 | 14.8 | 23.2 |                      |
|                          | ≥3                         | 20,5 | 9.5  | 12.3 | 28.9 |                      |
| Fibrates. %              |                            | 6.1  | 5.1  | 5.8  | 6.8  | 0.279                |
| AAS. %                   |                            | 24.4 | 8.6  | 16.8 | 35.3 | 0.001                |
| P2Y12 inhibitors. %      |                            | 3    | 0.6  | 0.6  | 5    | 0.002                |
| Antidiabetic drugs       |                            |      |      |      |      |                      |
|                          | Metformin. %               | 98.5 | 97.1 | 99.4 | 99.1 | 0.043                |
|                          | Sulphonylurea. %           | 40.8 | 33.1 | 52.9 | 41.7 | 0.001                |
|                          | Dpp4i. %                   | 18.7 | 19.1 | 29.7 | 15.5 | 0.001                |
|                          | Sglt2i. %                  | 15.2 | 15.6 | 20   | 13.7 | 0.154                |
|                          | Pioglitazone. %            | 2.9  | 3.2  | 5.2  | 2.1  | 0.133                |
|                          | GLP1a. %                   | 1    | 0.3  | 1.3  | 1.2  | 0.368                |
|                          | Insulin. %                 | 19.5 | 13.7 | 20   | 22.6 | 0.006                |
| Number of ADT            |                            |      |      |      |      | 0.001 <sup>a</sup>   |
|                          | 0                          | 1.5  | 2.9  | 0.6  | 0.9  |                      |
|                          | 1                          | 42.9 | 46.5 | 26.5 | 30.8 |                      |
|                          | 2                          | 37.9 | 34.1 | 47.7 | 37.3 |                      |
|                          | ≥3                         | 17.8 | 16.6 | 25.2 | 16.4 |                      |

T2D, type 2 diabetes; SBP, systolic blood pressure; LDL-C, LDL cholesterol; A1c, glycated hemoglobin; CV, cardiovascular; CVD, cardiovascular disease; LLT, lipid-lowering treatment; CVR, cardiovascular risk; VHR, very-high risk; HR, high-risk; MR, moderate-risk; eGFR, estimated glomerular filtration rate; MiS: moderate intensity statin; HiS, high-intensity statin; Ez, ezetimibe; AHT, antihypertensive therapy; ADT, antidiabetic therapy.

|                   |     | Univariate |      |      | Adjusted |            |       |       |         |
|-------------------|-----|------------|------|------|----------|------------|-------|-------|---------|
| A1c               |     | OR (95%CI) | LB   | UB   | p value  | OR (95%CI) | LB    | UB    | p value |
| Age               |     | 1.05       | 1.04 | 1.08 | < 0.001  | 1.079      | 1.046 | 1.112 | < 0.001 |
| Male              |     | 0.95       | 0.71 | 1.27 | 0.740    | 0.824      | 0.538 | 1.262 | 0.373   |
| Diabetes duration |     | 0.95       | 0.92 | 0.97 | < 0.001  | 0.947      | 0.915 | 0.979 | 0.001   |
| Schooling         |     | 1.01       | 0.97 | 1.04 | 0.777    | 1.058      | 0.998 | 1.122 | 0.060   |
| High income       |     | 1.28       | 0.89 | 1.83 | 0.180    | 1.477      | 0.930 | 2.346 | 0.098   |
| BMI               |     | 0.99       | 0.96 | 1.02 | 0.368    | 0.991      | 0.945 | 1.038 | 0.691   |
| CVR               |     |            |      |      | 0.002    |            |       |       | 0.990   |
|                   | MR  | Ref        |      |      |          | ref        |       |       |         |
|                   | HR  | 0.59       | 0.43 | 0.83 | 0.002    | 0.535      | 0.264 | 1.083 | 0.082   |
|                   | VHR | 0.49       | 0.30 | 0.78 | 0.003    | 0.578      | 0.336 | 0.993 | 0.047   |
| SBP               |     |            |      |      |          |            |       |       |         |
| Age               |     | 0.96       | 0.95 | 0.98 | < 0.001  | 0.973      | 0.946 | 0.999 | 0.045   |
| Male              |     | 0.96       | 0.72 | 1.28 | 0.782    | 0.820      | 0.546 | 1.232 | 0.340   |
| Diabetes duration |     | 0.98       | 0.96 | 1.01 | 0.296    | 1.024      | 0.993 | 1.057 | 0.130   |
| Schooling         |     | 1.04       | 1.01 | 1.09 | 0.007    | 1.056      | 0.997 | 1.118 | 0.065   |
| High income       |     | 1.63       | 1.13 | 2.36 | 0.010    | 1.307      | 0.843 | 2.026 | 0.231   |
| BMI               |     | 0.99       | 0.96 | 1.02 | 0.424    | 1.003      | 0.960 | 1.048 | 0.894   |
| CVR               |     |            |      |      | <0.001   |            |       |       | 0.018   |
|                   | MR  | Ref        |      |      |          |            |       |       |         |
|                   | HR  | 0.72       | 0.47 | 1.11 | 0.138    | 0.606      | 0.319 | 1.151 | 0.126   |
|                   | VHR | 0.45       | 0.33 | 0.63 | < 0.001  | 0.473      | 0.282 | 0.794 | 0.005   |
| LDL-C             |     |            |      |      |          |            |       |       |         |
| Age               |     | 0.98       | 0.95 | 1.00 | 0.053    | 1.021      | 0.984 | 1.060 | 0.262   |
| Male              |     | 1.53       | 1.01 | 2.32 | 0.047    | 1.678      | 0.937 | 3.006 | 0.082   |
| Diabetes duration |     | 0.95       | 0.92 | 0.99 | 0.004    | 1.020      | 0.975 | 1.067 | 0.380   |
| Schooling         |     | 1.04       | 0.99 | 1.09 | 0.076    | 0.992      | 0.916 | 1.073 | 0.833   |
| High income       |     | 1.39       | 0.88 | 2.21 | 0.157    | 1.222      | 0.657 | 2.227 | 0.527   |
| BMI               |     | 0.96       | 0.92 | 0.99 | 0.043    | 1.033      | 0.970 | 1.099 | 0.313   |
| CVR               |     |            |      |      | < 0.001  |            |       |       | < 0.001 |
|                   | MR  | Ref        |      |      |          | Ref        |       |       |         |
|                   | HR  | 0.22       | 0.12 | 0.43 | < 0.001  | 0.170      | 0.069 | 0.417 | < 0.001 |
|                   | VHR | 0.11       | 0.07 | 0.18 | < 0.001  | 0.084      | 0.039 | 0.181 | < 0.001 |
| Any two           |     |            |      |      |          |            |       |       |         |
| Age               |     | 1.01       | 0.98 | 1.03 | 0.929    | 1.037      | 0.998 | 1.078 | 0.063   |
| Male              |     | 0.88       | 0.59 | 1.34 | 0.560    | 0.730      | 0.415 | 1.284 | 0.274   |
| Diabetes duration |     | 0.94       | 0.91 | 0.98 | 0.001    | 0.979      | 0.933 | 1.027 | 0.385   |
| Schooling         |     | 1.05       | 0.99 | 1.10 | 0.088    | 1.131      | 1.044 | 1.225 | 0.003   |
| High income       |     | 1.46       | 0.89 | 2.39 | 0.134    | 1.090      | 0.582 | 2.041 | 0.787   |
| BMI               |     | 0.99       | 0.96 | 1.04 | 0.876    | 1.038      | 0.976 | 1.104 | 0.236   |
| CVR               |     |            |      |      | < 0.001  |            |       |       | < 0.001 |
|                   | MR  | Ref        |      |      |          | Ref        |       |       |         |
|                   | HR  | 0.21       | 0.09 | 0.45 | < 0.001  | 0.212      | 0.078 | 0.578 | 0.002   |
|                   | VHR | 0.28       | 0.18 | 0.44 | < 0.001  | 0.196      | 0.095 | 0.401 | < 0.001 |
| All three         |     |            |      |      |          |            |       |       |         |

|                   |      |      |      |         |         |       |       |       |       |
|-------------------|------|------|------|---------|---------|-------|-------|-------|-------|
| Age               | 0.98 | 0.93 | 1.05 | 0.697   | 1.042   | 0.956 | 1.135 | 0.352 |       |
| Male              | 1.20 | 0.47 | 3.09 | 0.703   | 1.010   | 0.260 | 3.922 | 0.988 |       |
| Diabetes duration | 0.92 | 0.84 | 1.01 | 0.064   | 0.965   | 0.831 | 1.120 | 0.640 |       |
| Schooling         | 1.06 | 0.94 | 1.19 | 0.366   | 0.995   | 0.827 | 1.196 | 0.954 |       |
| High income       | 1.47 | 0.41 | 5.31 | 0.549   | 1.262   | 0.264 | 6.031 | 0.771 |       |
| BMI               | 0.88 | 0.79 | 0.99 | 0.041   | 0.969   | 0.822 | 1.142 | 0.706 |       |
| CVR               |      |      |      | < 0.001 |         |       |       | 0.126 |       |
|                   | MR   | Ref  |      |         | Ref     |       |       |       |       |
|                   | HR   | 0.39 | 0.11 | 1.38    | 0.145   | 0.240 | 0.019 | 3.040 | 0.271 |
|                   | VHR  | 0.06 | 0.01 | 0.28    | < 0.001 | 0.146 | 0.022 | 0.974 | 0.047 |

Logistic regression using attainment to A1c, SBP, LDL-C, any two and all three goals as dependent variables. OR, odds ratio; CI, confidence interval; BMI, body mass index; CVR, cardiovascular risk; MR, moderate risk; HR, high risk; VHR, very-high risk
